# Supplementary material
Source: PubMed Central journal article supplement (PMC4522312)

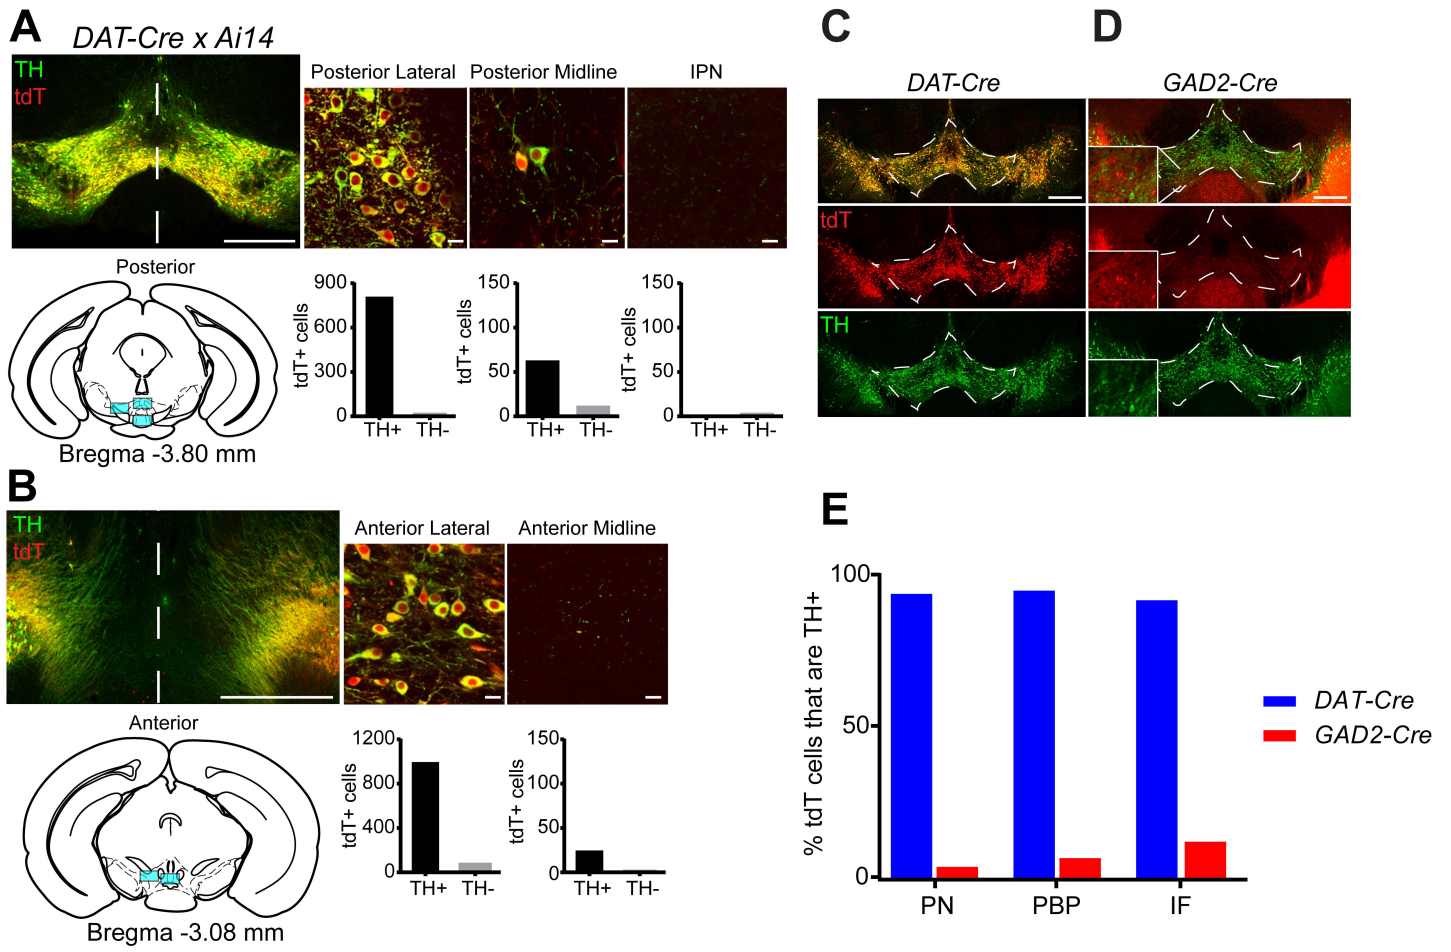

Figure S1

Supplement: NIHMS709563-supplement-3.pdf [file NIHMS709563-supplement-3.pdf]

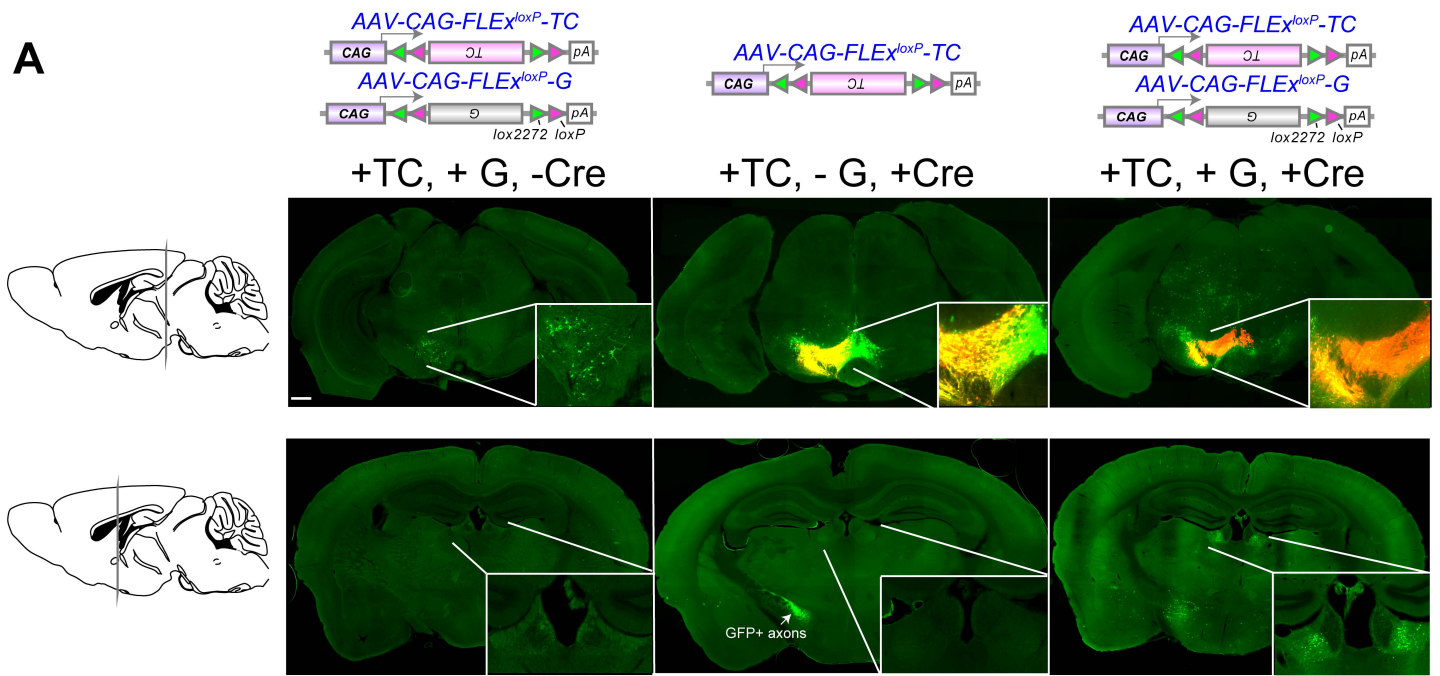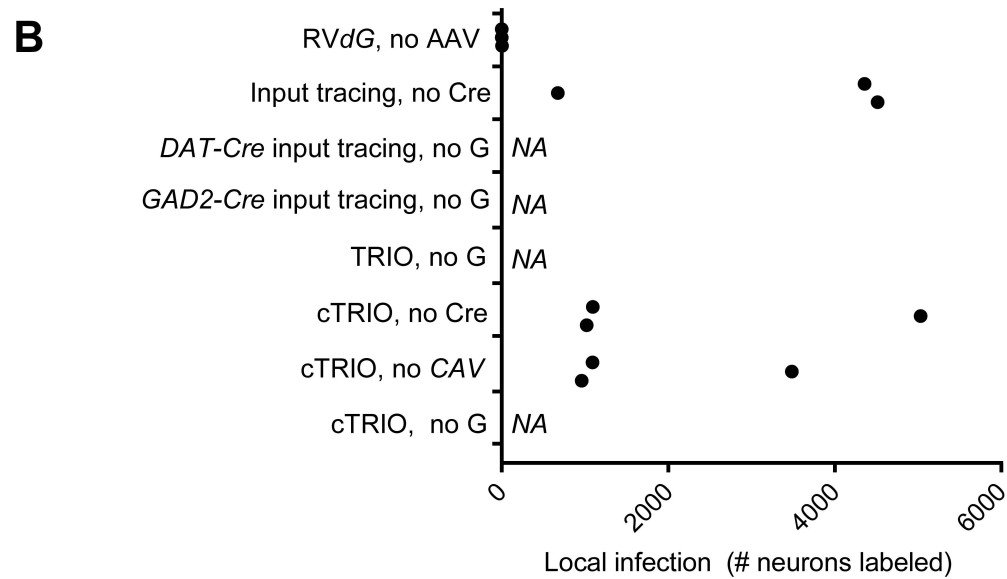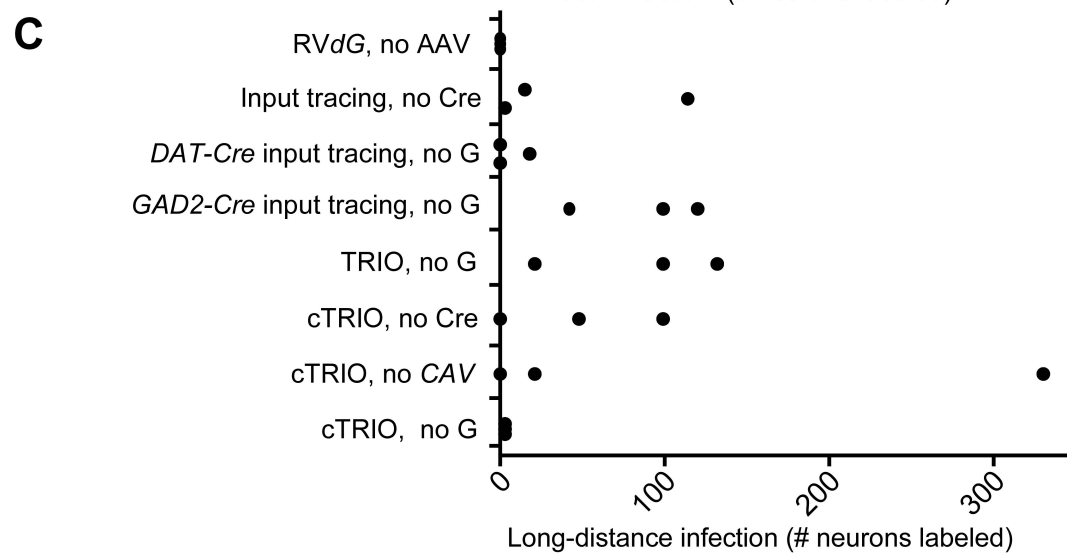

Figure S2

Supplement: NIHMS709563-supplement-4.pdf [file NIHMS709563-supplement-4.pdf]

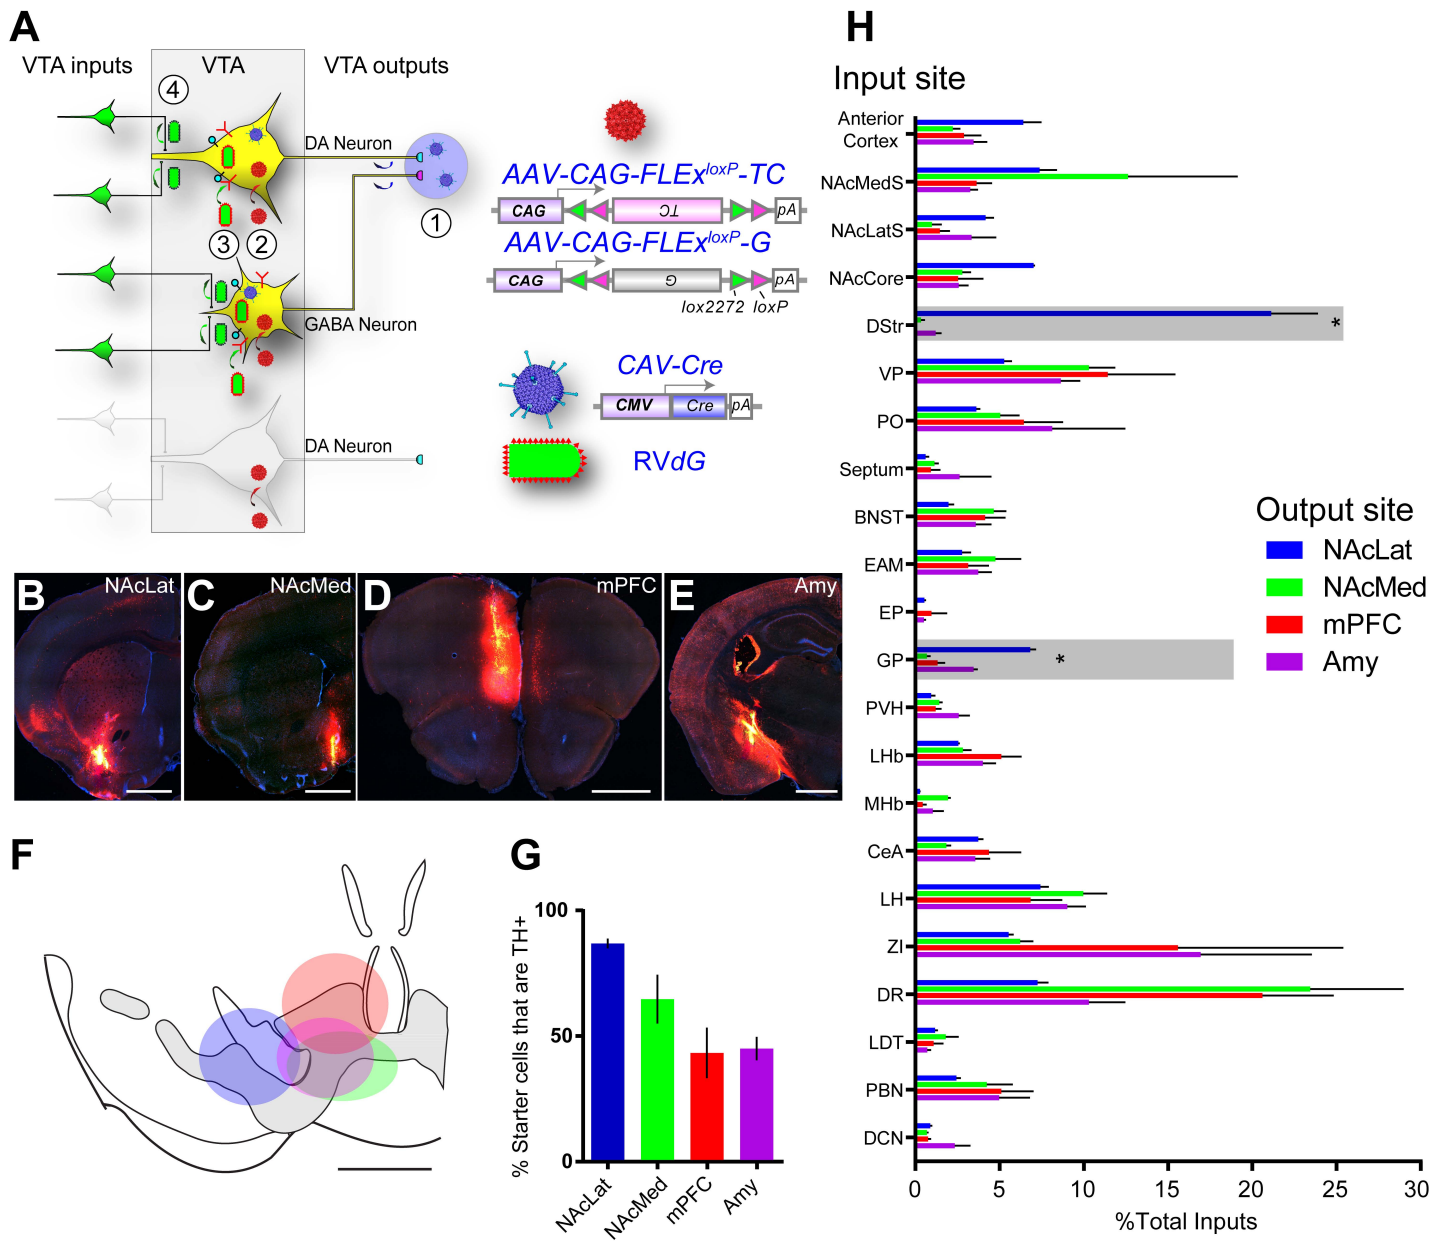

Figure S3

Supplement: NIHMS709563-supplement-5.pdf [file NIHMS709563-supplement-5.pdf]

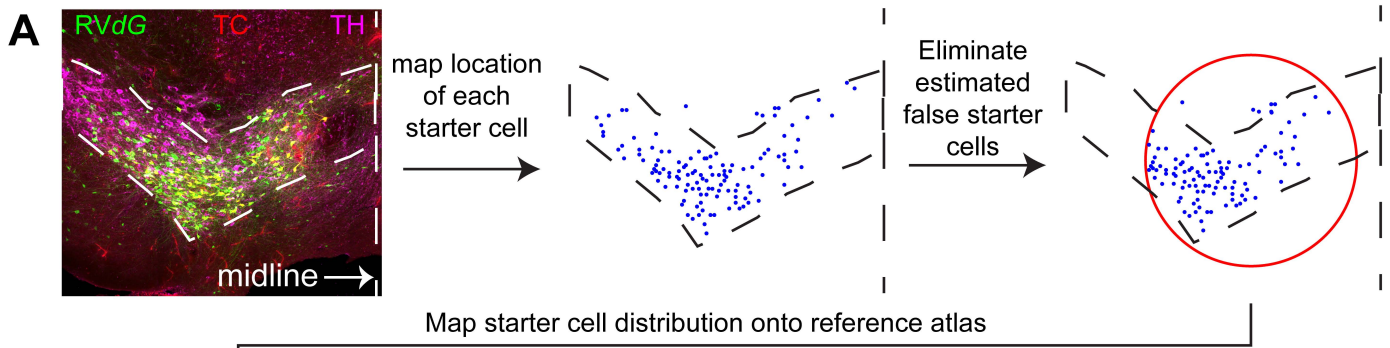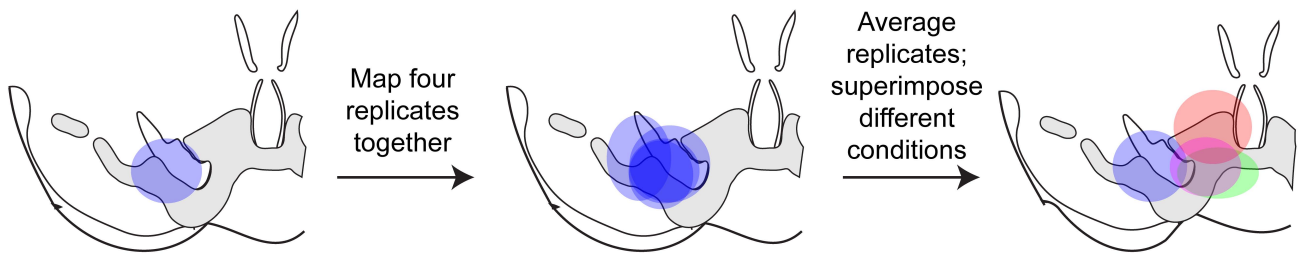

### Cre input tracing starter cells

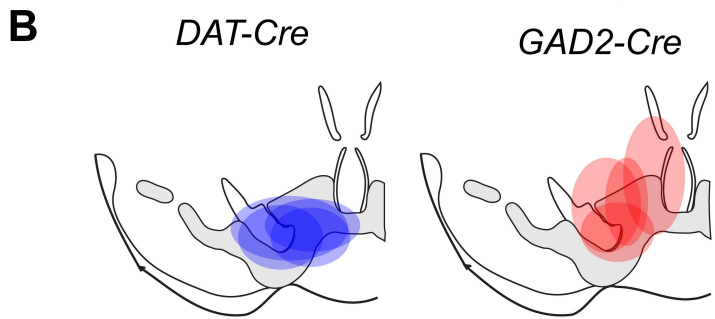

### TRIO starter cells

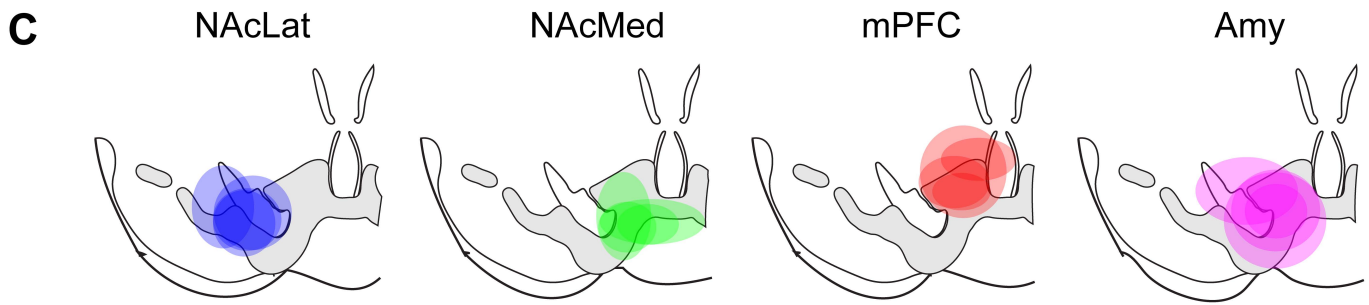

### cTRIO starter cells

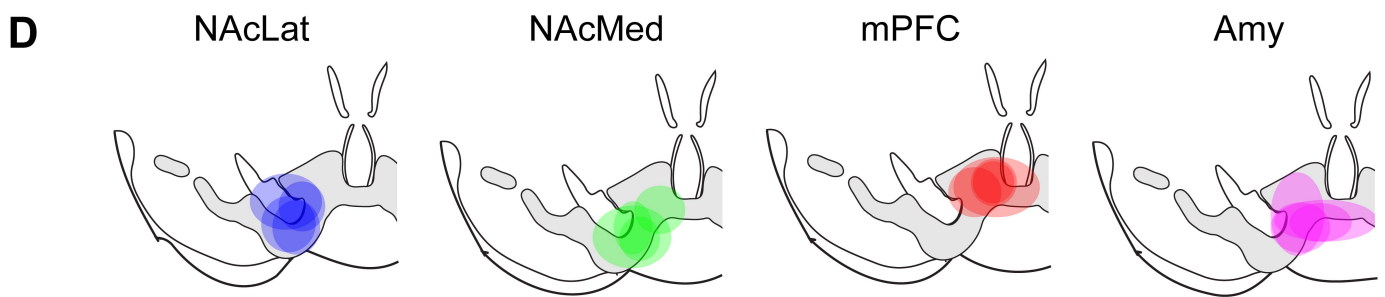

Figure S4

Supplement: NIHMS709563-supplement-6.pdf [file NIHMS709563-supplement-6.pdf]

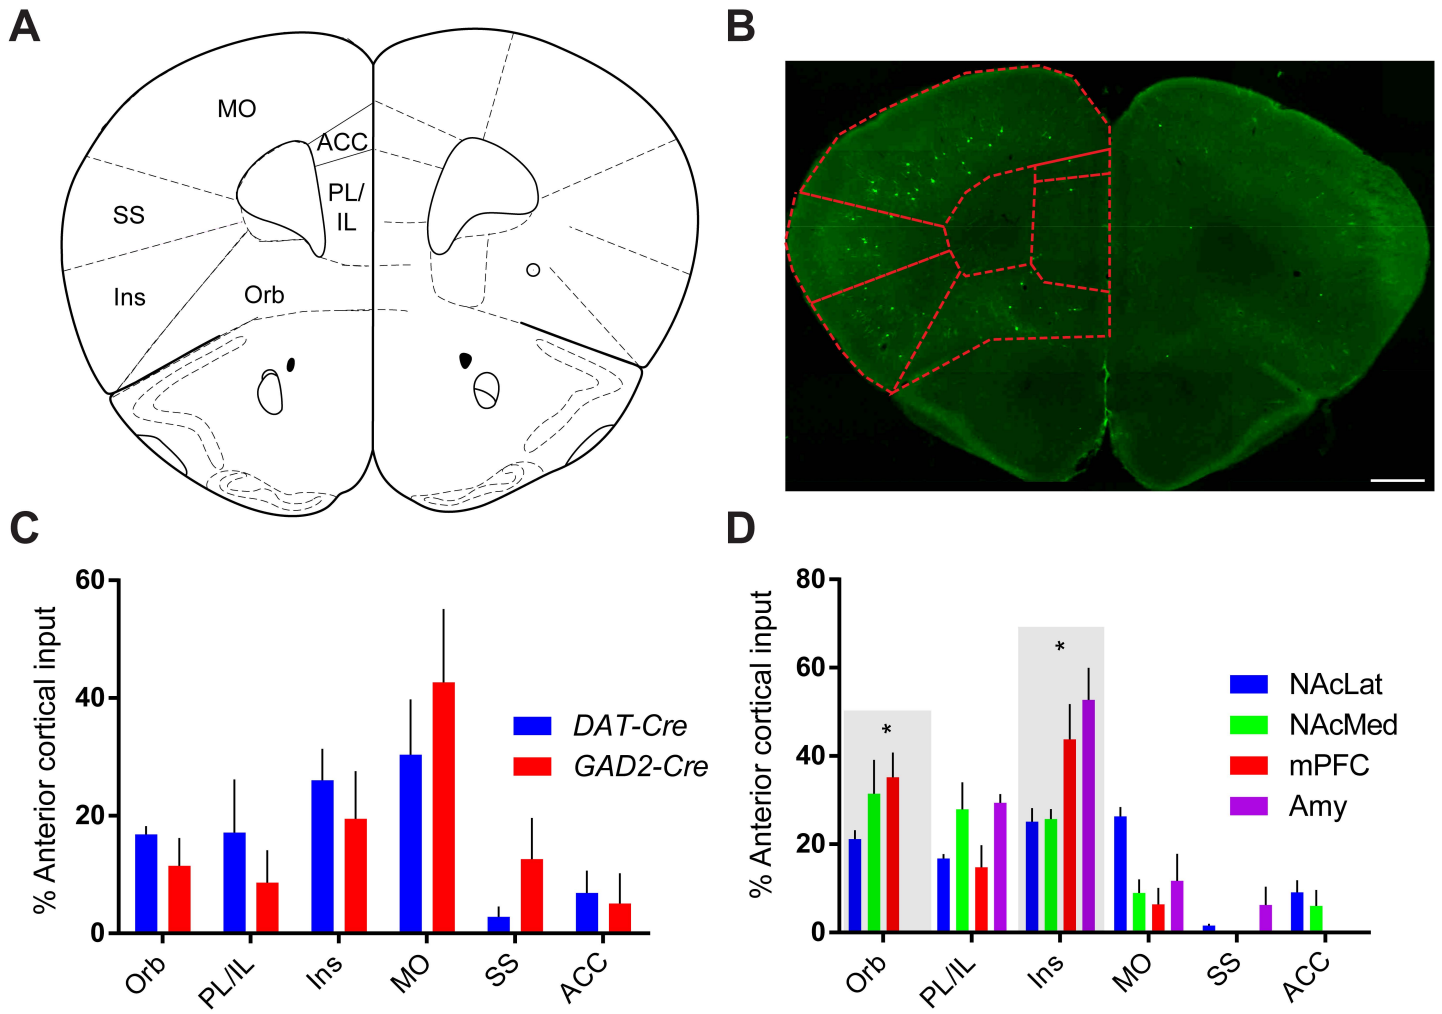

Figure S5

Supplement: NIHMS709563-supplement-7.pdf [file NIHMS709563-supplement-7.pdf]

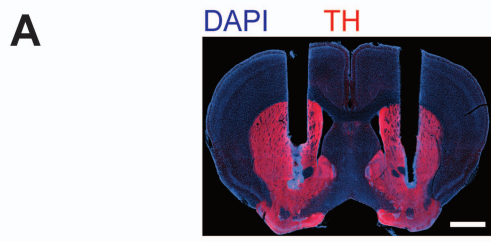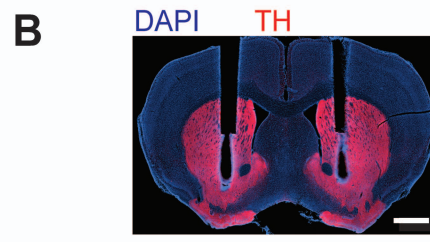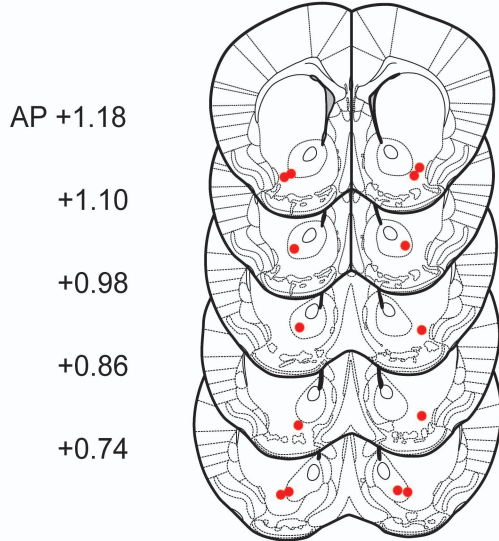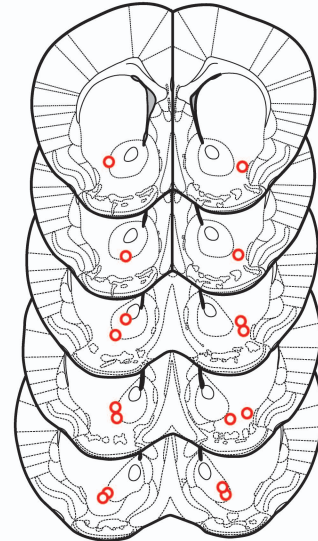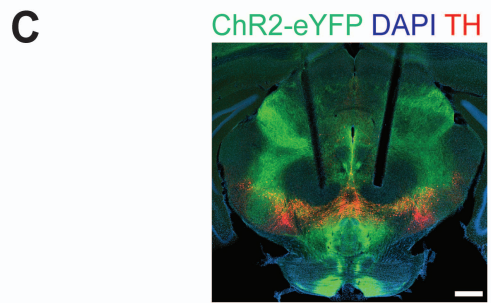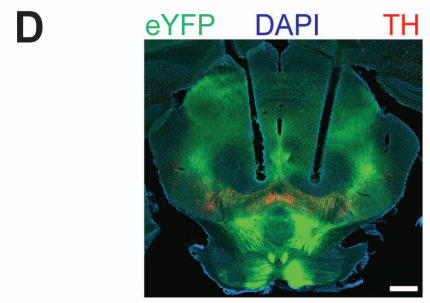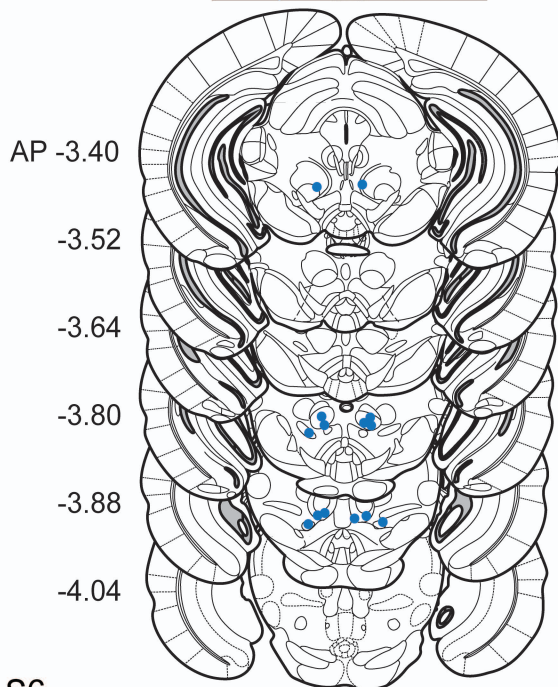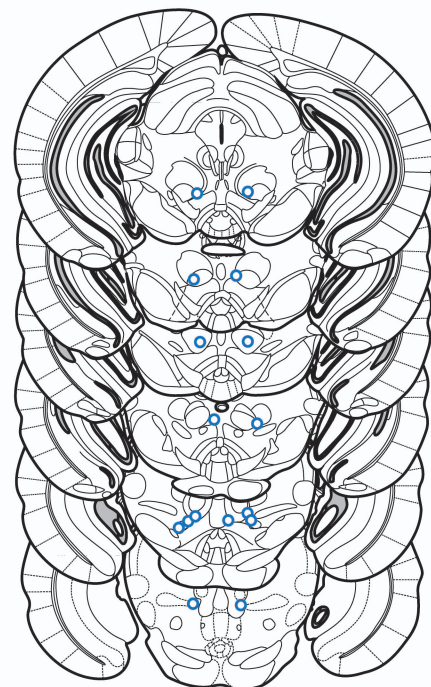

Figure S6

Supplement: NIHMS709563-supplement-8.pdf [file NIHMS709563-supplement-8.pdf]
